# Supplementary material
Source: PubMed Central journal article supplement (PMC11188852)
Supplement: NIHMS1984368-supplement-Supplementary_Data_Figure_Legends_and_Tables.pdf [file NIHMS1984368-supplement-Supplementary_Data_Figure_Legends_and_Tables.pdf]

## Supplementary Information

# ***C. difficile* intoxicates neurons and pericytes to drive neurogenic inflammation**

**Supplementary Table 1:** A list of antibody information.

**Supplementary Figure 1:** A figure containing the source western blot scans and Coomassie staining related to **Extended Data Figure 5f**.

### **Supplementary Video 1: Pericytes envelope colonic vascular network.**

Mouse colonic tissue from Cspg4-DsRed mice was harvested, processed by whole mount, and subjected to immunostaining with BABB optical clearing of tissue. Z-stack images were captured on a Zeiss LSM 700 confocal microscope with Zen Black software. Z-stack images were processed and rendered into 3D image movies using Aivia image analysis software. In the 3D image movie, an initial view is seen peering down at epithelium lining bottom of intestinal crypts (background non-specific green fluorescence signal). Removal of epithelial background reveals CD31 immunolabeled capillary networks and a deeper arteriole (green). DsRed antibody immunolabeled Cspg4-DsRed reporter pericytes (magenta) are found in close juxtaposition to the vascular network throughout.

### **Supplementary Video 2: Pericytes wrap around mucosal capillaries.**

Mouse colonic tissue from Cspg4-DsRed mice was harvested, processed by cryosection, and subjected to immunostaining. Z-stack images were captured on a Zeiss LSM 880 confocal microscope with Zen Black software. Z-stack images were processed and rendered into 3D image movies using Aivia image analysis software. The movie demonstrates a 3D-view of two CSPG4-reporter labeled pericytes (magenta). CD31 immunolabeled labeled capillaries (green) are found nestled within the pericyte bodies and wrapped within pericyte cellular processes.

### **Supplementary Video 3: Colonic neurovascular unit comprised of pericyte, capillary, CGRP+ neuron processes.**

Mouse colonic tissue from Cspg4-DsRed mice was harvested, processed by cryosection, and subjected to immunostaining. Z-stack images were captured on a Zeiss LSM 880 confocal microscope with Zen Black software. Z-stack images were processed and rendered into 3D image movies using Aivia image analysis software. The movie demonstrates a 3D-image of a colonic neurovascular unit. A single CSPG4-dsRed reporter labeled pericyte (magenta) is shown. A CD31 immunolabeled vessel (green) is surrounded by the pericyte body and its processes. CGRP immunolabeled neuron processes (gray) appear to interact with the pericyte at multiple points.

## Supplementary Table 1

### Primary Antibodies

| Target                          | Host    | Vendor         | Cat. No.  | Concentration |
|---------------------------------|---------|----------------|-----------|---------------|
| Calcr1                          | Rabbit  | Sigma Aldrich  | HPA008070 | 1:1000        |
| CD31                            | Goat    | R&D Systems    | AF3628    | 1:1000        |
| CD31                            | Rat     | BD Biosciences | 553708    | 1:500         |
| CGRP                            | Rabbit  | Immunostar     | 24112     | 1:1000-2000   |
| DsRed                           | Rabbit  | TakaRa         | 632496    | 1:500-1000    |
| GFP                             | Chicken | Aves           | GFP-1020  | 1:1000        |
| GFP                             | Rabbit  | Invitrogen     | A11122    | 1:1000        |
| HuC/D                           | Rabbit  | Abcam          | ab184267  | 1:1000-2000   |
| HuC/D<br>(ANNA1)                | Human   | gift V. Lennon | n/a       | 1:1000-2000   |
| Lyve1                           | Goat    | R&D Systems    | AF2125    | 1:1000        |
| Pdgfra                          | Goat    | R&D Systems    | AF1062    | 1:1000        |
| Ramp1                           | Rabbit  | Alomone        | ARR-021   | 1:1000        |
| 5HT<br>(serotonin)              | Goat    | Immunostar     | 20079     | 1:1000        |
| $\alpha$ Smooth<br>Muscle Actin | Rabbit  | Abcam          | ab5694    | 1:1000        |
| Smooth<br>Muscle Actin<br>(1A4) | Mouse   | Sigma Aldrich  | A5228     | 1:200         |
| CD117/cKit                      | Goat    | R&D Systems    | AF1356    | 1:1000        |
| Substance P                     | Rabbit  | Immunostar     | 20064     | 1:100-500     |
| Tubb3 (Tuj1)                    | Mouse   | Biolegend      | 801201    | 1:500-2000    |

### Secondary Antibodies

Secondary antibodies for immunohistochemistry were all applied at a concentration of 1:500 unless otherwise specified.

| Antibody                     | Fluorophore     | Vendor               | Cat. No. |
|------------------------------|-----------------|----------------------|----------|
| Donkey anti-Rabbit IgG (H+L) | Alexa Fluor 594 | Life Tech/Invitrogen | A21207   |
| Donkey anti-Rabbit IgG (H+L) | Alexa Fluor 647 | Invitrogen           | A32795   |
| Donkey anti-Rabbit IgG (H+L) | Alexa Fluor 488 | Life Tech/Invitrogen | A21206   |

|                               |                  |                      |             |
|-------------------------------|------------------|----------------------|-------------|
| Donkey anti-Rabbit IgG (H+L)  | Alexa Fluor 488  | Abcam                | ab150073    |
| Donkey anti-Rat IgG (H+L)     | Alexa Fluor 488  | Invitrogen           | A21208      |
| Donkey anti-Goat IgG (H+L)    | Alexa Fluor 568  | Invitrogen           | A11057      |
| Donkey anti-Goat IgG (H+L)    | Alexa Fluor 647  | Life Tech/Invitrogen | A21447      |
| Donkey anti-Goat IgG          | CF 647           | Millipore            | SAB4600175  |
| Donkey anti-Goat IgG (H+L)    | Alexa Fluor 488  | Invitrogen           | A11055      |
| Donkey anti-Goat IgG (H+L)    | Alexa Fluoro 647 | Invitrogen           | A21447      |
| Donkey anti-Chicken IgY (H+L) | Alexa Fluor 488  | Invitrogen           | A78948      |
| Donkey anti-Chicken IgY (H+L) | FITC             | Invitrogen           | SA1-72000   |
| Donkey anti-Human IgG (H+L)   | Alexa Fluor 647  | Jackson              | 709-605-149 |
| Donkey anti-Human IgG (H+L)   | DyLight 594      | Thermofisher         | SA5-100215  |
| Donkey anti-Mouse IgG (H+L)   | Alexa Fluor 647  | Jackson              | 715-605-151 |
| Donkey anti-Mouse IgG (H+L)   | Alexa Fluor 647  | Invitrogen           | A31571      |
| Donkey anti-Mouse IgG (H+L)   | Alexa Fluor488   | Abcam                | ab150109    |
| Goat anti-Rabbit IgG (H+L)    | Alexa Fluor 647  | Life Tech/Invitrogen | A21244      |
| Goat anti-Rat IgG (H+L)       | Alexa Fluor 647  | Life Tech/Invitrogen | A21247      |
| Goat anti-Rat IgG (H+L)       | Alexa Fluor 488  | Invitrogen           | A11006      |
| Goat anti-Mouse IgG2a         | Alexa Fluor 488  | Life Tech/Invitrogen | A21131      |
| Goat anti-Chicken IgY (H+L)   | Alexa Fluor 488  | Invitrogen           | A11039      |
| Goat anti-Rabbit IgG (H+L)    | Alexa Fluor 488  | Jackson              | 111-545-144 |
| Goat anti-Mouse IgG (H+L)     | Alexa Fluor 647  | Invitrogen           | A-21236     |

**Supplementary Figure 1.**

Calcr1

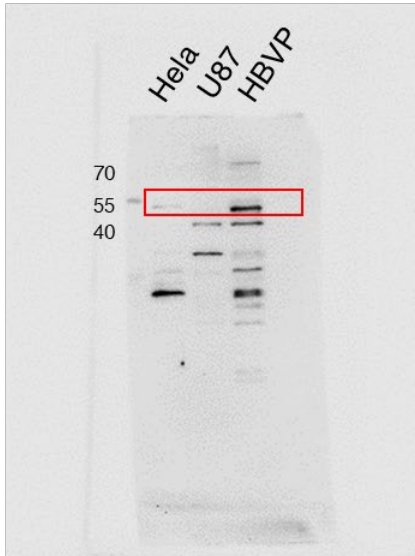

Sigma-Aldrich Antibody

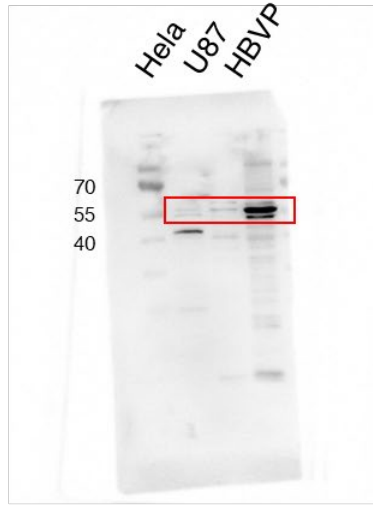

Additional Validation  
Not shown  
BLOSS Antibody

Ramp1

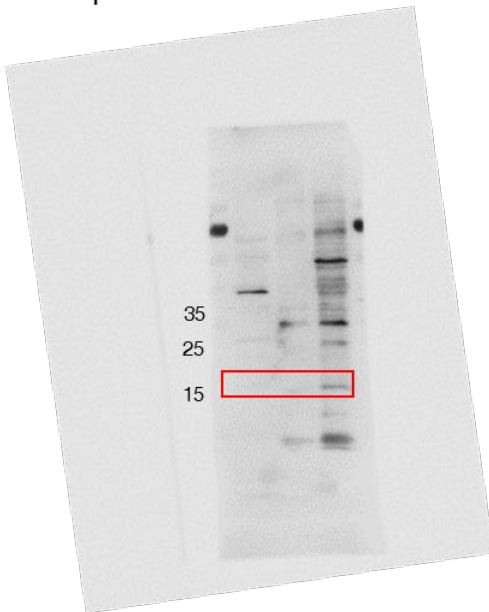

Sample Processing Control - Coomassie

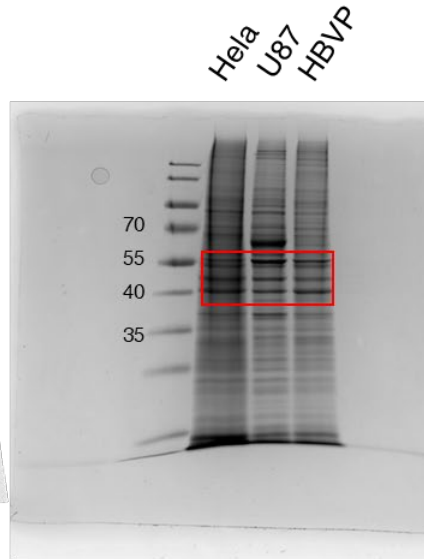

**Supplementary Figure 1:** Full Western blot scans related to **Ext. Data Figure 5I**, and full scan of Coomassie staining of SDS-PAGE (sample processing control).
